# Supplementary material for: Collaborative training of regulators as an approach for strengthening regulatory systems in LMICs: experiences of the WHO and Swissmedic
Source: Frontiers journal article supplement (doi:10.3389/fmed.2023.1173291), 2023-05-18
Supplement: Data_Sheet_3.PDF [file Data_Sheet_3.PDF]

**Follow-up Questionnaire to immediate supervisors of the previous participants in the WHO-Swissmedic Collaborative training of Regulators.**

*(You can type-in your responses directly on this soft copy OR you can print it and fill in by hand)*

|                                                                                                   |  |
|---------------------------------------------------------------------------------------------------|--|
| Name and country of the Regulatory Authority                                                      |  |
|                                                                                                   |  |
| Name of the immediate supervisor                                                                  |  |
| Name(s) of the supervisee(s) here referred to                                                     |  |
| Name of the Unit/ Department/ Division/ Agency under your supervision (please cross the unwanted) |  |
|                                                                                                   |  |

|       |                                                                                                                                                          |
|-------|----------------------------------------------------------------------------------------------------------------------------------------------------------|
| Qn. 1 | In what ways do you see that the WHO-Swissmedic training has helped your supervisee's ability to carry out the regulatory duties under your supervision? |
|       |                                                                                                                                                          |

|       |                                                                                                                                                                     |
|-------|---------------------------------------------------------------------------------------------------------------------------------------------------------------------|
| Qn. 2 | What are the factors limiting the implementation of the knowledge and skills acquired from the WHO-Swissmedic training in the settings/area under your supervision? |
|       |                                                                                                                                                                     |
| Qn. 3 | Do you have any other comments regarding the WHO-Swissmedic training?                                                                                               |
|       |                                                                                                                                                                     |

***Please send the scanned copies of the signed consent form and the filled questionnaire to the email address:***
